# Supplementary material for: Solvent effect on hierarchical assembly of 2-aminooctane-functionalized naphthalenediimide
Source: Royal Society of Chemistry journal article supplement (doi:10.1039/c3ra45372c), 2013-12-19
Supplement: c3ra45372c.pdf [file c3ra45372c.pdf]

Supporting information for:

## Solvent Effect on Hierarchical Assembly of 2-Aminooctane- Functionalized Naphthalenediimide

Feng-Xia Wang <sup>a</sup>, Yong-Qiang Liu <sup>a,b</sup>, Song Qiu <sup>a</sup>, and Ge-Bo Pan <sup>a,\*</sup>

<sup>a</sup> Suzhou Institute of Nano-tech and Nano-bionics, Chinese Academy of Sciences,  
215123 Suzhou, P. R. China

<sup>b</sup> Also at Graduate University of Chinese Academy of Sciences

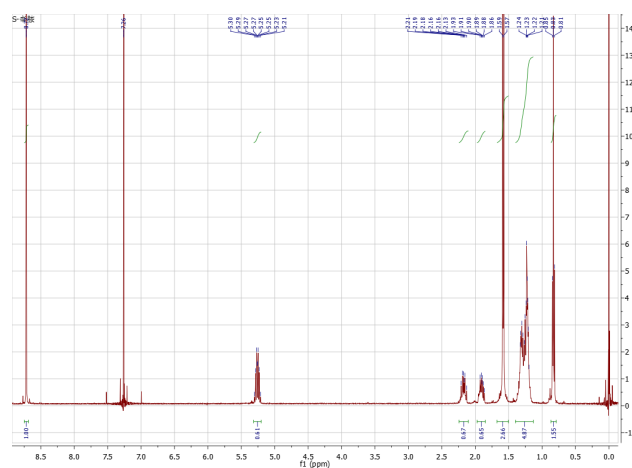

Fig. S1 <sup>1</sup>H NMR spectroscopy of NDI.

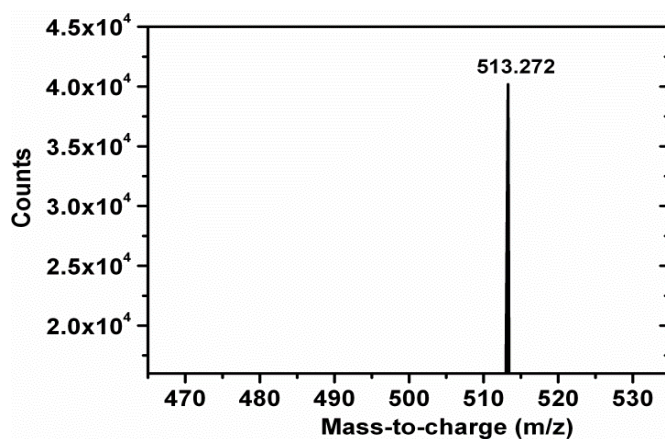

Fig. S2 HRMS of NDI.

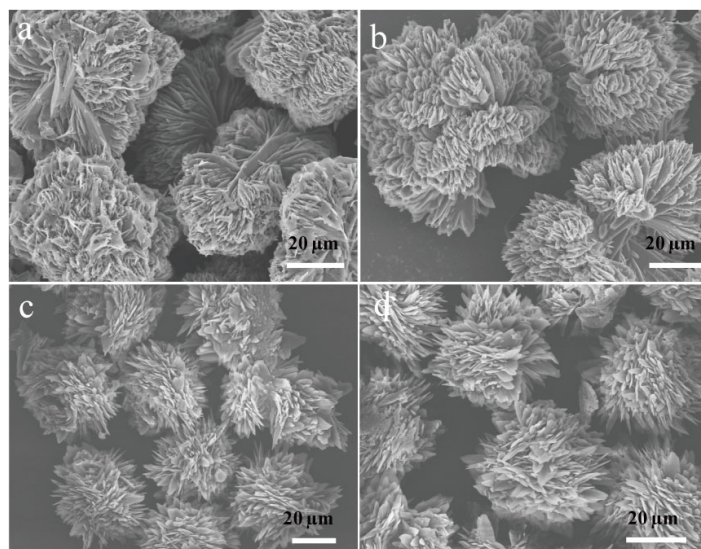

**Fig. S3** SEM images of hierarchical architectures of NDI. The volume ratios of methanol to ethyl acetate were: (a) 5:1, (b) 10: 1, (c) 20:1, and (d) 50:1. The concentration of NDI in ethyl acetate was fixed at 3 mM.

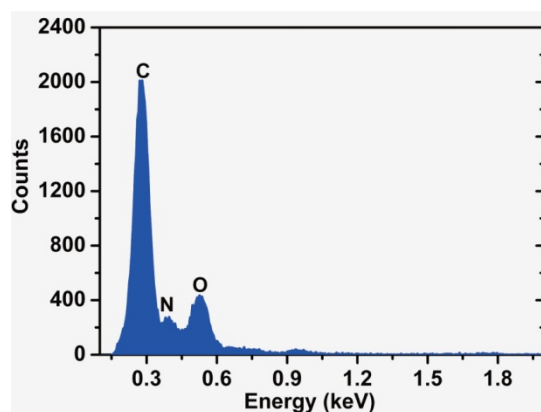

**Fig. S4** EDX spectrum of hierarchical architectures of NDI.

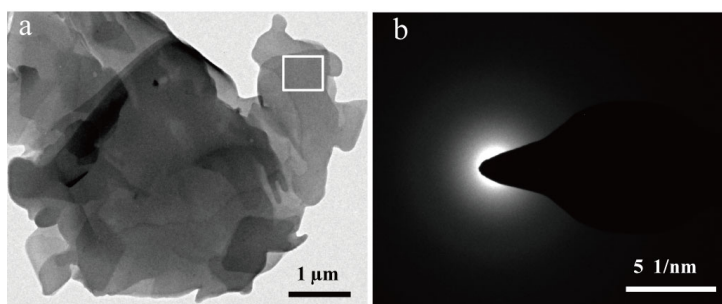

**Fig. S5** (a) TEM image and (b) corresponding SAED pattern of sheet-like structures of NDI.
